# Supplementary material
Source: PubMed Central journal article supplement (PMC7733703)
Supplement: NIHMS1574270-supplement-Supp_info.pdf [file NIHMS1574270-supplement-Supp_info.pdf]

**The association of clinically determined periodontal disease and edentulism with total cancer mortality:  
the National Health and Nutrition Examination Survey III**

Yuhan Huang, Dominique S. Michaud, Jiayun S. Lu, Elizabeth A. Platz

|                    |
|--------------------|
| Contents           |
| Supplement Table 1 |
| Supplement Table 2 |
| Supplement Table 3 |
| Supplement Table 4 |
| Supplement Table 5 |
| Supplement Table 6 |

Supplement Table 1. Weighted Characteristics of Participants Overall and across CDC/AAP Definitions of Periodontal Disease and Edentulism, 6,034 Participants  $\geq 40$  Years Old in NHANES III <sup>a</sup>

|                                   | Overall<br>(n=6,034) | No Periodontal<br>Disease<br>(n=3,586) | Mild Periodontal<br>Disease<br>(n=163) | Moderate<br>Periodontal<br>Disease<br>(n=919) | Severe Periodontal<br>Disease<br>(n=214) | Edentulism<br>(n=1,152) |
|-----------------------------------|----------------------|----------------------------------------|----------------------------------------|-----------------------------------------------|------------------------------------------|-------------------------|
| Age, mean (SD), year              | 56.7 (12.5)          | 53.9 (10.8)                            | 54.7 (11.0)                            | 59.0 (14.0)                                   | 59.5 (13.0)                              | 66.1 (12.7)             |
| Male (%)                          | 48.4                 | 46.2                                   | 55.0                                   | 61.5                                          | 69.8                                     | 44.2                    |
| BMI, mean (SD), kg/m <sup>2</sup> | 27.4 (5.1)           | 27.3 (4.7)                             | 27.9 (4.8)                             | 27.5 (5.6)                                    | 27.9 (7.1)                               | 27.7 (5.8)              |
| Race/ethnicity (%)                |                      |                                        |                                        |                                               |                                          |                         |
| Non-Hispanic White                | 80.1                 | 81.2                                   | 73.0                                   | 73.6                                          | 61.0                                     | 84.1                    |
| Non-Hispanic Black                | 10.1                 | 8.5                                    | 14.9                                   | 15.5                                          | 21.8                                     | 10.0                    |
| Mexican-American                  | 3.5                  | 3.7                                    | 3.8                                    | 4.9                                           | 4.6                                      | 1.4                     |
| Other race/ethnicity              | 6.4                  | 6.6                                    | 8.4                                    | 6.0                                           | 12.6                                     | 4.6                     |
| Health insurance (%)              |                      |                                        |                                        |                                               |                                          |                         |
| Covered                           | 96.8                 | 97.0                                   | 93.2                                   | 96.2                                          | 92.4                                     | 97.5                    |
| Education (%)                     |                      |                                        |                                        |                                               |                                          |                         |
| <High school                      | 14.3                 | 8.5                                    | 12.6                                   | 16.8                                          | 27.8                                     | 33.5                    |
| High school                       | 46.4                 | 43.1                                   | 48.3                                   | 55.2                                          | 51.3                                     | 52.4                    |
| >High school                      | 39.4                 | 48.4                                   | 38.1                                   | 28.0                                          | 20.9                                     | 14.1                    |
| Income (%), dollars               |                      |                                        |                                        |                                               |                                          |                         |
| <16,000                           | 20.0                 | 13.2                                   | 27.9                                   | 27.0                                          | 28.0                                     | 40.2                    |
| 16,000-39,999                     | 35.6                 | 35.2                                   | 36.1                                   | 34.2                                          | 42.8                                     | 37.1                    |
| >39,999                           | 44.4                 | 51.7                                   | 36.0                                   | 38.8                                          | 29.2                                     | 22.7                    |
| Pack-years, mean (SD)             | 15.0 (24.8)          | 10.8 (18.7)                            | 18.5 (27.3)                            | 22.0 (31.9)                                   | 23.1 (33.0)                              | 25.2 (36.3)             |
| Cigarette smoking status (%)      |                      |                                        |                                        |                                               |                                          |                         |
| Never                             | 44.8                 | 51.5                                   | 37.1                                   | 29.1                                          | 20.6                                     | 33.6                    |
| Former                            | 33.5                 | 32.2                                   | 43.2                                   | 31.6                                          | 31.0                                     | 38.9                    |
| Current                           | 21.7                 | 16.3                                   | 19.8                                   | 39.3                                          | 48.4                                     | 27.5                    |

|              |      |      |      |      |      |      |  |
|--------------|------|------|------|------|------|------|--|
| Diabetes (%) |      |      |      |      |      |      |  |
| No diabetes  | 53.3 | 59.5 | 50.8 | 41.5 | 38.4 | 39.2 |  |
| Pre-diabetes | 34.0 | 30.9 | 35.8 | 41.6 | 39.8 | 40.0 |  |
| Diabetes     | 12.7 | 9.6  | 13.4 | 16.9 | 21.8 | 20.8 |  |

<sup>a</sup> CDC/AAP = Centers for Disease Control/American Academy of Periodontology, SD = standard deviation

<sup>a</sup> Assessed one upper quadrant and one lower quadrant. Mild periodontitis was defined as  $\geq 2$  interproximal sites with AL  $\geq 3$  mm, and  $\geq 2$  interproximal sites with PD  $\geq 4$  mm (not on the same tooth) or 1 site with PD  $\geq 5$  mm. Moderate periodontitis was defined as  $\geq 2$  interproximal sites with AL  $\geq 4$  mm (not on the same tooth), or  $\geq 2$  interproximal sites with PD  $\geq 5$  mm (not on the same tooth). Severe periodontitis was defined as  $\geq 2$  interproximal sites with AL  $\geq 6$  mm (not on the same tooth), and  $\geq 1$  interproximal site with PD  $\geq 5$  mm.

Supplement Table 2. Overall and Obesity-Specific Association of Periodontal Disease and Edentulism with Total Cancer Mortality, 6,034 Participants  $\geq 40$  Years Old in NHANES III<sup>a</sup>

|                         | Overall |              |                   | Obesity specific |             |                   |                  |             |                   |
|-------------------------|---------|--------------|-------------------|------------------|-------------|-------------------|------------------|-------------|-------------------|
|                         | Cases   | Person-years | HR (95% CI)       | Normal BMI       |             |                   | Overweight/Obese |             |                   |
| Cases                   |         |              |                   | Person-years     | HR (95% CI) | Cases             | Person-years     | HR (95% CI) |                   |
| Model 1 <sup>b</sup>    |         |              |                   |                  |             |                   |                  |             |                   |
| Periodontitis (NHANES)  |         |              |                   |                  |             |                   |                  |             |                   |
| No                      | 353     | 70847        | 1 (ref)           | 120              | 21535       | 1 (ref)           | 233              | 49312       | 1 (ref)           |
| Yes                     | 151     | 20534        | 1.17 (0.85, 1.62) | 41               | 5444        | 1.10 (0.60, 1.99) | 110              | 15090       | 1.19 (0.81, 1.76) |
| Edentulism              | 198     | 14537        | 1.96 (1.45, 2.65) | 72               | 4862        | 1.53 (0.95, 2.46) | 126              | 9674        | 2.18 (1.59, 3.00) |
| Periodontitis (CDC/AAP) |         |              |                   |                  |             |                   |                  |             |                   |
| No                      | 318     | 70483        | 1 (ref)           | 103              | 21027       | 1 (ref)           | 215              | 49456       | 1 (ref)           |
| Mild                    | 17      | 3007         | 1.15 (0.60, 2.20) | 4                | 726         | 0.86 (0.24, 3.02) | 13               | 2281        | 1.33 (0.60, 2.95) |
| Moderate                | 133     | 14591        | 1.29 (0.89, 1.87) | 45               | 4218        | 1.55 (0.84, 2.86) | 88               | 10373       | 1.13 (0.74, 1.70) |
| Severe                  | 36      | 3299         | 1.72 (0.88, 3.35) | 9                | 1007        | 1.99 (0.54, 7.35) | 27               | 2292        | 1.46 (0.78, 2.75) |
| <i>P</i> -trend         |         |              | 0.07              |                  |             | 0.13              |                  |             | 0.29              |
| Edentulism              | 198     | 14537        | 2.04 (1.49, 2.80) | 72               | 4862        | 1.70 (1.04, 2.77) | 126              | 9674        | 2.21 (1.60, 3.04) |
| Model 2 <sup>c</sup>    |         |              |                   |                  |             |                   |                  |             |                   |
| Periodontitis (NHANES)  |         |              |                   |                  |             |                   |                  |             |                   |
| No                      | 353     | 70847        | 1 (ref)           | 120              | 21535       | 1 (ref)           | 233              | 49312       | 1 (ref)           |
| Yes                     | 151     | 20534        | 1.00 (0.73, 1.37) | 41               | 5444        | 0.94 (0.52, 1.68) | 110              | 15090       | 1.03 (0.70, 1.53) |
| Edentulism              | 198     | 14537        | 1.58 (1.19, 2.09) | 72               | 4862        | 1.15 (0.71, 1.87) | 126              | 9674        | 1.78 (1.31, 2.41) |
| Periodontitis (CDC/AAP) |         |              |                   |                  |             |                   |                  |             |                   |
| No                      | 318     | 70483        | 1 (ref)           | 103              | 21027       | 1 (ref)           | 215              | 49456       | 1 (ref)           |
| Mild                    | 17      | 3007         | 1.10 (0.59, 2.03) | 4                | 726         | 0.78 (0.24, 2.51) | 13               | 2281        | 1.35 (0.66, 2.78) |
| Moderate                | 133     | 14591        | 1.02 (0.70, 1.48) | 45               | 4218        | 1.19 (0.63, 2.26) | 88               | 10373       | 0.92 (0.60, 1.42) |
| Severe                  | 36      | 3299         | 1.23 (0.62, 2.45) | 9                | 1007        | 1.29 (0.35, 4.82) | 27               | 2292        | 1.09 (0.56, 2.13) |
| <i>P</i> -trend         |         |              | 0.55              |                  |             | 0.45              |                  |             | 0.95              |

|                      |                         |     |       |                   |     |       |                   |     |       |                   |
|----------------------|-------------------------|-----|-------|-------------------|-----|-------|-------------------|-----|-------|-------------------|
| Model 3 <sup>d</sup> | Edentulism              | 198 | 14537 | 1.61 (1.20, 2.16) | 72  | 4862  | 1.24 (0.74, 2.08) | 126 | 9674  | 1.76 (1.30, 2.39) |
|                      | Periodontitis (NHANES)  |     |       |                   |     |       |                   |     |       |                   |
|                      | No                      | 353 | 70847 | 1 (ref)           | 120 | 21535 | 1 (ref)           | 233 | 49312 | 1 (ref)           |
|                      | Yes                     | 151 | 20534 | 0.99 (0.72, 1.36) | 41  | 5444  | 0.93 (0.50, 1.72) | 110 | 15090 | 1.00 (0.69, 1.47) |
|                      | Edentulism              | 198 | 14537 | 1.50 (1.12, 2.00) | 72  | 4862  | 1.09 (0.64, 1.87) | 126 | 9674  | 1.68 (1.25, 2.24) |
|                      | Periodontitis (CDC/AAP) |     |       |                   |     |       |                   |     |       |                   |
|                      | No                      | 318 | 70483 | 1 (ref)           | 103 | 21027 | 1 (ref)           | 215 | 49456 | 1 (ref)           |
|                      | Mild                    | 17  | 3007  | 1.06 (0.56, 1.99) | 4   | 726   | 0.71 (0.20, 2.53) | 13  | 2281  | 1.28 (0.63, 2.58) |
|                      | Moderate                | 133 | 14591 | 1.00 (0.68, 1.46) | 45  | 4218  | 1.20 (0.63, 2.28) | 88  | 10373 | 0.89 (0.58, 1.36) |
|                      | Severe                  | 36  | 3299  | 1.20 (0.60, 2.38) | 9   | 1007  | 1.28 (0.30, 5.35) | 27  | 2292  | 1.03 (0.54, 1.98) |
|                      | <i>P</i> -trend         |     |       | 0.70              |     |       | 0.53              |     |       | 0.87              |
|                      | Edentulism              | 198 | 14537 | 1.52 (1.12, 2.07) | 72  | 4862  | 1.19 (0.67, 2.11) | 126 | 9674  | 1.65 (1.23, 2.22) |

<sup>a</sup> HR = hazard ratio, CI = confidence interval, CDC/AAP = Centers for Disease Control/American Academy of Periodontology

<sup>b</sup> Model 1 adjusted for age in years (continuous), sex (males and females), and race/ethnicity (non-Hispanic Black, and non-Hispanic White, Mexican-American, other race/ethnicity).

<sup>c</sup> Model 2 adjusted for age in years (continuous), sex (males and females), race/ethnicity (non-Hispanic Black, and non-Hispanic White, Mexican-American, other race/ethnicity), body mass index (continuous), pack years (continuous), smoking status (never, former, current), and diabetes (non-diabetic, pre-diabetic, diabetic).

<sup>d</sup> Model 3 adjusted for age in years (continuous), sex (males and females), race/ethnicity (non-Hispanic Black, and non-Hispanic White, Mexican-American, other race/ethnicity), body mass index (continuous), pack years (continuous), smoking status (never, former, current), diabetes (non-diabetic, pre-diabetic, diabetic), education (<high school, high school, >high school), annual family income (<\$25000, \$25000-\$74999, >\$74999), and health insurance (covered and not covered).

Supplement Table 3. Overall and Diabetes-Specific Association of Periodontal Disease and Edentulism with Total Cancer Mortality, 6,034 Participants  $\geq 40$  Years Old in NHANES III<sup>a</sup>

|                         | Overall |              |                   | Diabetes specific <sup>c</sup> |              |                   |              |              |                   |
|-------------------------|---------|--------------|-------------------|--------------------------------|--------------|-------------------|--------------|--------------|-------------------|
|                         |         |              |                   | Non-diabetic                   |              |                   | Pre/diabetic |              |                   |
|                         | Cases   | Person-years | HR (95% CI)       | Cases                          | Person-years | HR (95% CI)       | Cases        | Person-years | HR (95% CI)       |
| Model 1 <sup>b</sup>    |         |              |                   |                                |              |                   |              |              |                   |
| Periodontitis (NHANES)  |         |              |                   |                                |              |                   |              |              |                   |
| No                      | 353     | 70847        | 1 (ref)           | 150                            | 36140        | 1 (ref)           | 203          | 34707        | 1 (ref)           |
| Yes                     | 151     | 20534        | 1.17 (0.85, 1.62) | 54                             | 8417         | 0.89 (0.53, 1.50) | 97           | 12117        | 1.53 (1.12, 2.10) |
| Edentulism              | 198     | 14537        | 1.96 (1.45, 2.65) | 64                             | 5483         | 0.89 (0.53, 1.50) | 134          | 9054         | 2.24 (1.47, 3.41) |
| Periodontitis (CDC/AAP) |         |              |                   |                                |              |                   |              |              |                   |
| No                      | 318     | 70483        | 1 (ref)           | 138                            | 36884        | 1 (ref)           | 180          | 33599        | 1 (ref)           |
| Mild                    | 17      | 3007         | 1.15 (0.60, 2.20) | 7                              | 1326         | 0.68 (0.26, 1.75) | 10           | 1681         | 1.64 (0.79, 3.39) |
| Moderate                | 133     | 14591        | 1.29 (0.89, 1.87) | 48                             | 5320         | 1.67 (0.92, 3.05) | 85           | 9271         | 1.06 (0.73, 1.53) |
| Severe                  | 36      | 3299         | 1.72 (0.88, 3.35) | 11                             | 1027         | 1.43 (0.60, 3.41) | 25           | 2272         | 2.00 (0.90, 4.42) |
| <i>P</i> -trend         |         |              | 0.07              |                                |              | 0.10              |              |              | 0.21              |
| Edentulism              | 198     | 14537        | 2.04 (1.49, 2.80) | 64                             | 5483         | 1.83 (1.08, 3.08) | 134          | 9054         | 2.17 (1.41, 3.34) |
| Model 2 <sup>c</sup>    |         |              |                   |                                |              |                   |              |              |                   |
| Periodontitis (NHANES)  |         |              |                   |                                |              |                   |              |              |                   |
| No                      | 353     | 70847        | 1 (ref)           | 150                            | 36140        | 1 (ref)           | 203          | 34707        | 1 (ref)           |
| Yes                     | 151     | 20534        | 1.00 (0.73, 1.37) | 54                             | 8417         | 0.76 (0.46, 1.26) | 97           | 12117        | 1.34 (0.98, 1.83) |
| Edentulism              | 198     | 14537        | 1.58 (1.19, 2.09) | 64                             | 5483         | 1.33 (0.80, 2.20) | 134          | 9054         | 1.80 (1.19, 2.73) |
| Periodontitis (CDC/AAP) |         |              |                   |                                |              |                   |              |              |                   |
| No                      | 318     | 70483        | 1 (ref)           | 138                            | 36884        | 1 (ref)           | 180          | 33599        | 1 (ref)           |

|                         |     |       |                   |     |       |                   |     |       |                   |
|-------------------------|-----|-------|-------------------|-----|-------|-------------------|-----|-------|-------------------|
| Mild                    | 17  | 3007  | 1.10 (0.59, 2.03) | 7   | 1326  | 0.62 (0.24, 1.62) | 10  | 1681  | 1.62 (0.80, 3.28) |
| Moderate                | 133 | 14591 | 1.02 (0.70, 1.48) | 48  | 5320  | 1.37 (0.75, 2.51) | 85  | 9271  | 0.84 (0.59, 1.21) |
| Severe                  | 36  | 3299  | 1.23 (0.62, 2.45) | 11  | 1027  | 1.07 (0.39, 2.92) | 25  | 2272  | 1.54 (0.72, 3.30) |
| <i>P</i> -trend         |     |       | 0.55              |     |       | 0.36              |     |       | 0.78              |
| Edentulism              | 198 | 14537 | 1.61 (1.20, 2.16) | 64  | 5483  | 1.49 (0.89, 2.51) | 134 | 9054  | 1.69 (1.10, 2.59) |
| Model 3 <sup>d</sup>    |     |       |                   |     |       |                   |     |       |                   |
| Periodontitis (NHANES)  |     |       |                   |     |       |                   |     |       |                   |
| No                      | 353 | 70847 | 1 (ref)           | 150 | 36140 | 1 (ref)           | 203 | 34707 | 1 (ref)           |
| Yes                     | 151 | 20534 | 0.99 (0.72, 1.36) | 54  | 8417  | 0.75 (0.45, 1.27) | 97  | 12117 | 1.30 (0.95, 1.78) |
| Edentulism              | 198 | 14537 | 1.50 (1.12, 2.00) | 64  | 5483  | 1.26 (0.72, 2.19) | 134 | 9054  | 1.71 (1.13, 2.59) |
| Periodontitis (CDC/AAP) |     |       |                   |     |       |                   |     |       |                   |
| No                      | 318 | 70483 | 1 (ref)           | 138 | 36884 | 1 (ref)           | 180 | 33599 | 1 (ref)           |
| Mild                    | 17  | 3007  | 1.06 (0.56, 1.99) | 7   | 1326  | 0.61 (0.23, 1.60) | 10  | 1681  | 1.53 (0.74, 3.18) |
| Moderate                | 133 | 14591 | 1.00 (0.68, 1.46) | 48  | 5320  | 1.37 (0.73, 2.57) | 85  | 9271  | 0.82 (0.56, 1.20) |
| Severe                  | 36  | 3299  | 1.20 (0.60, 2.38) | 11  | 1027  | 1.06 (0.37, 3.04) | 25  | 2272  | 1.48 (0.69, 3.19) |
| <i>P</i> -trend         |     |       | 0.70              |     |       | 0.48              |     |       | 0.88              |
| Edentulism              | 198 | 14537 | 1.52 (1.12, 2.07) | 64  | 5483  | 1.44 (0.80, 2.57) | 134 | 9054  | 1.60 (1.05, 2.45) |

<sup>a</sup> HR = hazard ratio, CI = confidence interval, CDC/AAP = Centers for Disease Control/American Academy of Periodontology

<sup>b</sup> Model 1 adjusted for age in years (continuous), sex (males and females), and race/ethnicity (non-Hispanic Black, and non-Hispanic White, Mexican-American, other race/ethnicity).

<sup>c</sup> Model 2 adjusted for age in years (continuous), sex (males and females), race/ethnicity (non-Hispanic Black, and non-Hispanic White, Mexican-American, other race/ethnicity), body mass index (continuous), pack years (continuous), smoking status (never, former, current), and diabetes (non-diabetic, pre-diabetic, diabetic).

<sup>d</sup> Model 3 adjusted for age in years (continuous), sex (males and females), race/ethnicity (non-Hispanic Black, and non-Hispanic White, Mexican-American, other race/ethnicity), body mass index (continuous), pack years (continuous), smoking status (never, former, current), diabetes (non-diabetic, pre-diabetic, diabetic), education (<high school, high school, >high school), annual family income (<\$25000, \$25000-\$74999, >\$74999), and health insurance (covered and not covered).

<sup>e</sup> For analysis stratified by diabetes, none of the three models adjusted for diabetes.

Supplement Table 4. Overall and Smoking-Specific Association of Periodontal Disease and Edentulism with Total Cancer Mortality, 6,034 Participants  $\geq 40$  Years Old in NHANES III<sup>a</sup>

|                         | Overall |              |                   | Smoking specific <sup>c</sup> |             |                   |              |             |                   |
|-------------------------|---------|--------------|-------------------|-------------------------------|-------------|-------------------|--------------|-------------|-------------------|
|                         | Cases   | Person-years | HR (95% CI)       | Never Smoker                  |             |                   | Ever Smoker  |             |                   |
| Cases                   |         |              |                   | Person-years                  | HR (95% CI) | Cases             | Person-years | HR (95% CI) |                   |
| Model 1 <sup>b</sup>    |         |              |                   |                               |             |                   |              |             |                   |
| Periodontitis (NHANES)  |         |              |                   |                               |             |                   |              |             |                   |
| No                      | 353     | 70847        | 1 (ref)           | 145                           | 37614       | 1 (ref)           | 208          | 33233       | 1 (ref)           |
| Yes                     | 151     | 20534        | 1.17 (0.85, 1.62) | 35                            | 7911        | 0.61 (0.39, 0.96) | 116          | 12623       | 1.24 (0.84, 1.81) |
| Edentulism              | 198     | 14537        | 1.96 (1.45, 2.65) | 55                            | 6285        | 1.18 (0.76, 1.83) | 143          | 8252        | 2.00 (1.36, 2.92) |
| Periodontitis (CDC/AAP) |         |              |                   |                               |             |                   |              |             |                   |
| No                      | 318     | 70483        | 1 (ref)           | 140                           | 37924       | 1 (ref)           | 178          | 32560       | 1 (ref)           |
| Mild                    | 17      | 3007         | 1.15 (0.60, 2.20) | 6                             | 1391        | 1.19 (0.40, 3.57) | 11           | 1616        | 1.06 (0.47, 2.40) |
| Moderate                | 133     | 14591        | 1.29 (0.89, 1.87) | 29                            | 5305        | 0.83 (0.43, 1.57) | 104          | 9286        | 1.27 (0.81, 2.00) |
| Severe                  | 36      | 3299         | 1.72 (0.88, 3.35) | 5                             | 905         | 1.06 (0.39, 2.83) | 31           | 2394        | 1.58 (0.73, 3.42) |
| <i>P</i> -trend         |         |              | 0.07              |                               |             | 0.70              |              |             | 0.17              |
| Edentulism              | 198     | 14537        | 2.04 (1.49, 2.80) | 55                            | 6285        | 1.23 (0.75, 2.00) | 143          | 8252        | 2.05 (1.38, 3.05) |
| Model 2 <sup>c</sup>    |         |              |                   |                               |             |                   |              |             |                   |
| Periodontitis (NHANES)  |         |              |                   |                               |             |                   |              |             |                   |
| No                      | 353     | 70847        | 1 (ref)           | 145                           | 37614       | 1 (ref)           | 208          | 33233       | 1 (ref)           |
| Yes                     | 151     | 20534        | 1.00 (0.73, 1.37) | 35                            | 7911        | 0.60 (0.38, 0.94) | 116          | 12623       | 1.16 (0.79, 1.70) |
| Edentulism              | 198     | 14537        | 1.58 (1.19, 2.09) | 55                            | 6285        | 1.12 (0.73, 1.73) | 143          | 8252        | 1.78 (1.22, 2.60) |
| Periodontitis (CDC/AAP) |         |              |                   |                               |             |                   |              |             |                   |
| No                      | 318     | 70483        | 1 (ref)           | 140                           | 37924       | 1 (ref)           | 178          | 32560       | 1 (ref)           |
| Mild                    | 17      | 3007         | 1.10 (0.59, 2.03) | 6                             | 1391        | 1.19 (0.40, 3.54) | 11           | 1616        | 1.07 (0.48, 2.37) |
| Moderate                | 133     | 14591        | 1.02 (0.70, 1.48) | 29                            | 5305        | 0.81 (0.43, 1.54) | 104          | 9286        | 1.11 (0.71, 1.76) |
| Severe                  | 36      | 3299         | 1.23 (0.62, 2.45) | 5                             | 905         | 0.94 (0.35, 2.57) | 31           | 2394        | 1.31 (0.59, 2.90) |
| <i>P</i> -trend         |         |              | 0.55              |                               |             | 0.64              |              |             | 0.44              |



|                      |                         |     |       |                   |     |       |                   |     |       |                   |
|----------------------|-------------------------|-----|-------|-------------------|-----|-------|-------------------|-----|-------|-------------------|
| Model 3 <sup>d</sup> | Edentulism              | 198 | 14537 | 1.61 (1.20, 2.16) | 55  | 6285  | 1.17 (0.72, 1.89) | 143 | 8252  | 1.79 (1.20, 2.67) |
|                      | Periodontitis (NHANES)  |     |       |                   |     |       |                   |     |       |                   |
|                      | No                      | 353 | 70847 | 1 (ref)           | 145 | 37614 | 1 (ref)           | 208 | 33233 | 1 (ref)           |
|                      | Yes                     | 151 | 20534 | 0.99 (0.72, 1.36) | 35  | 7911  | 0.59 (0.38, 0.92) | 116 | 12623 | 1.14 (0.78, 1.67) |
|                      | Edentulism              | 198 | 14537 | 1.50 (1.12, 2.00) | 55  | 6285  | 1.09 (0.70, 1.71) | 143 | 8252  | 1.68 (1.14, 2.47) |
|                      | Periodontitis (CDC/AAP) |     |       |                   |     |       |                   |     |       |                   |
|                      | No                      | 318 | 70483 | 1 (ref)           | 140 | 37924 | 1 (ref)           | 178 | 32560 | 1 (ref)           |
|                      | Mild                    | 17  | 3007  | 1.06 (0.56, 1.99) | 6   | 1391  | 1.17 (0.39, 3.47) | 11  | 1616  | 1.04 (0.46, 2.34) |
|                      | Moderate                | 133 | 14591 | 1.00 (0.68, 1.46) | 29  | 5305  | 0.80 (0.41, 1.55) | 104 | 9286  | 1.09 (0.68, 1.74) |
|                      | Severe                  | 36  | 3299  | 1.20 (0.60, 2.38) | 5   | 905   | 0.94 (0.35, 2.53) | 31  | 2394  | 1.29 (0.58, 2.85) |
|                      | <i>P</i> -trend         |     |       | 0.70              |     |       | 0.53              |     |       | 0.52              |
|                      | Edentulism              | 198 | 14537 | 1.52 (1.12, 2.07) | 55  | 6285  | 1.14 (0.69, 1.89) | 143 | 8252  | 1.69 (1.12, 2.55) |

<sup>a</sup> HR = hazard ratio, CI = confidence interval, CDC/AAP = Centers for Disease Control/American Academy of Periodontology

<sup>b</sup> Model 1 adjusted for age in years (continuous), sex (males and females), and race/ethnicity (non-Hispanic Black, and non-Hispanic White, Mexican-American, other race/ethnicity).

<sup>c</sup> Model 2 adjusted for age in years (continuous), sex (males and females), race/ethnicity (non-Hispanic Black, and non-Hispanic White, Mexican-American, other race/ethnicity), body mass index (continuous), pack years (continuous), smoking status (never, former, current), and diabetes (non-diabetic, pre-diabetic, diabetic).

<sup>d</sup> Model 3 adjusted for age in years (continuous), sex (males and females), race/ethnicity (non-Hispanic Black, and non-Hispanic White, Mexican-American, other race/ethnicity), body mass index (continuous), pack years (continuous), smoking status (never, former, current), diabetes (non-diabetic, pre-diabetic, diabetic), education (<high school, high school, >high school), annual family income (<\$25000, \$25000-\$74999, >\$74999), and health insurance (covered and not covered).

<sup>e</sup> For analysis stratified by smoking status, none of the three models adjusted for pack years and smoking status in never smokers, and pack years and smoking status (former, current) were adjusted for ever smokers in model 2 and model 3.

Supplement Table 5. Sensitivity Analysis of Overall Association of Periodontal Disease and Edentulism with Total Cancer Mortality, 6,034 Participants  $\geq 40$  Years Old in NHANES III<sup>a</sup>

|                         | Censored at 11.0 years of follow-up |              |                   | Censored at 21.3 years of follow-up |              |                   | Censored at December, 2015 |              |                   |
|-------------------------|-------------------------------------|--------------|-------------------|-------------------------------------|--------------|-------------------|----------------------------|--------------|-------------------|
|                         | Cases                               | Person-years | HR (95% CI)       | Cases                               | Person-years | HR (95% CI)       | Cases                      | Person-years | HR (95% CI)       |
| Model 1 <sup>b</sup>    |                                     |              |                   |                                     |              |                   |                            |              |                   |
| Periodontitis (NHANES)  |                                     |              |                   |                                     |              |                   |                            |              |                   |
| No                      | 145                                 | 37735        | 1 (ref)           | 314                                 | 65190        | 1 (ref)           | 353                        | 70847        | 1 (ref)           |
| Yes                     | 69                                  | 11344        | 1.24 (0.84, 1.81) | 136                                 | 18855        | 1.15 (0.80, 1.66) | 151                        | 20534        | 1.17 (0.85, 1.62) |
| Edentulism              | 125                                 | 9758         | 2.15 (1.50, 3.06) | 192                                 | 13939        | 2.05 (1.49, 2.81) | 198                        | 14537        | 1.96 (1.45, 2.65) |
| Periodontitis (CDC/AAP) |                                     |              |                   |                                     |              |                   |                            |              |                   |
| No                      | 231                                 | 56441        | 1 (ref)           | 276                                 | 64575        | 1 (ref)           | 318                        | 70483        | 1 (ref)           |
| Mild                    | 14                                  | 2417         | 1.41 (0.69, 2.90) | 17                                  | 2740         | 1.38 (0.71, 2.69) | 17                         | 3007         | 1.15 (0.60, 2.20) |
| Moderate                | 110                                 | 12321        | 1.50 (1.04, 2.16) | 123                                 | 13637        | 1.33 (0.94, 1.88) | 133                        | 14591        | 1.29 (0.89, 1.87) |
| Severe                  | 28                                  | 2832         | 1.97 (0.91, 4.30) | 34                                  | 3094         | 1.96 (1.00, 3.87) | 36                         | 3299         | 1.72 (0.88, 3.35) |
| <i>P</i> -trend         |                                     |              | 0.02              |                                     |              | 0.04              |                            |              | 0.07              |
| Edentulism              | 177                                 | 12927        | 2.32 (1.61, 3.36) | 192                                 | 13939        | 2.18 (1.58, 3.03) | 198                        | 14537        | 2.04 (1.49, 2.80) |
| Model 2 <sup>c</sup>    |                                     |              |                   |                                     |              |                   |                            |              |                   |
| Periodontitis (NHANES)  |                                     |              |                   |                                     |              |                   |                            |              |                   |
| No                      | 145                                 | 37735        | 1 (ref)           | 314                                 | 65190        | 1 (ref)           | 353                        | 70847        | 1 (ref)           |
| Yes                     | 69                                  | 11344        | 1.05 (0.72, 1.53) | 136                                 | 18855        | 0.99 (0.69, 1.41) | 151                        | 20534        | 1.00 (0.73, 1.37) |
| Edentulism              | 125                                 | 9758         | 1.69 (1.21, 2.37) | 192                                 | 13939        | 1.63 (1.21, 2.19) | 198                        | 14537        | 1.58 (1.19, 2.09) |
| Periodontitis (CDC/AAP) |                                     |              |                   |                                     |              |                   |                            |              |                   |
| No                      | 231                                 | 56441        | 1 (ref)           | 276                                 | 64575        | 1 (ref)           | 318                        | 70483        | 1 (ref)           |
| Mild                    | 14                                  | 2417         | 1.35 (0.69, 2.67) | 17                                  | 2740         | 1.32 (0.70, 2.49) | 17                         | 3007         | 1.10 (0.59, 2.03) |
| Moderate                | 110                                 | 12321        | 1.16 (0.81, 1.67) | 123                                 | 13637        | 1.04 (0.73, 1.48) | 133                        | 14591        | 1.02 (0.70, 1.48) |
| Severe                  | 28                                  | 2832         | 1.38 (0.62, 3.08) | 34                                  | 3094         | 1.39 (0.69, 2.83) | 36                         | 3299         | 1.23 (0.62, 2.45) |
| <i>P</i> -trend         |                                     |              | 0.20              |                                     |              | 0.35              |                            |              | 0.55              |
| Edentulism              | 177                                 | 12927        | 1.78 (1.27, 2.52) | 192                                 | 13939        | 1.70 (1.25, 2.30) | 198                        | 14537        | 1.61 (1.20, 2.16) |
| Model 3 <sup>d</sup>    |                                     |              |                   |                                     |              |                   |                            |              |                   |

|                         |     |       |                   |     |       |                   |     |       |                   |  |
|-------------------------|-----|-------|-------------------|-----|-------|-------------------|-----|-------|-------------------|--|
| Periodontitis (NHANES)  |     |       |                   |     |       |                   |     |       |                   |  |
| No                      | 145 | 37735 | 1 (ref)           | 314 | 65190 | 1 (ref)           | 353 | 70847 | 1 (ref)           |  |
| Yes                     | 69  | 11344 | 1.03 (0.70, 1.50) | 136 | 18855 | 0.97 (0.68, 1.39) | 151 | 20534 | 0.99 (0.72, 1.36) |  |
| Edentulism              | 125 | 9758  | 1.62 (1.13, 2.30) | 192 | 13939 | 1.55 (1.14, 2.09) | 198 | 14537 | 1.50 (1.12, 2.00) |  |
| Periodontitis (CDC/AAP) |     |       |                   |     |       |                   |     |       |                   |  |
| No                      | 231 | 56441 | 1 (ref)           | 276 | 64575 | 1 (ref)           | 318 | 70483 | 1 (ref)           |  |
| Mild                    | 14  | 2417  | 1.30 (0.65, 2.61) | 17  | 2740  | 1.28 (0.67, 2.44) | 17  | 3007  | 1.06 (0.56, 1.99) |  |
| Moderate                | 110 | 12321 | 1.14 (0.79, 1.63) | 123 | 13637 | 1.01 (0.71, 1.46) | 133 | 14591 | 1.00 (0.68, 1.46) |  |
| Severe                  | 28  | 2832  | 1.33 (0.59, 2.96) | 34  | 3094  | 1.36 (0.67, 2.73) | 36  | 3299  | 1.20 (0.60, 2.38) |  |
| <i>P</i> -trend         |     |       | 0.27              |     |       | 0.46              |     |       | 0.70              |  |
| Edentulism              | 177 | 12927 | 1.70 (1.18, 2.44) | 192 | 13939 | 1.61 (1.17, 2.20) | 198 | 14537 | 1.52 (1.12, 2.07) |  |

<sup>a</sup> HR = hazard ratio, CI = confidence interval, CDC/AAP = Centers for Disease Control/American Academy of Periodontology

<sup>b</sup> Model 1 adjusted for age in years (continuous), sex (males and females), and race/ethnicity (non-Hispanic Black, and non-Hispanic White, Mexican-American, other race/ethnicity).

<sup>c</sup> Model 2 adjusted for age in years (continuous), sex (males and females), race/ethnicity (non-Hispanic Black, and non-Hispanic White, Mexican-American, other race/ethnicity), body mass index (continuous), pack years (continuous), smoking status (never, former, current), and diabetes (non-diabetic, pre-diabetic, diabetic).

<sup>d</sup> Model 3 adjusted for age in years (continuous), sex (males and females), race/ethnicity (non-Hispanic Black, and non-Hispanic White, Mexican-American, other race/ethnicity), body mass index (continuous), pack years (continuous), smoking status (never, former, current), diabetes (non-diabetic, pre-diabetic, diabetic), education (<high school, high school, >high school), annual family income (<\$25000, \$25000-\$74999, >\$74999), and health insurance (covered and not covered).

Supplement Table 6. Overall Association of Periodontal Disease and Edentulism with Total Cancer Mortality, 11,136 Participants  $\geq 18$  Years Old in NHANES III<sup>a</sup>

|                         | Cases | Overall<br>Person-years | HR (95% CI)       |
|-------------------------|-------|-------------------------|-------------------|
| Model 1 <sup>b</sup>    |       |                         |                   |
| Periodontitis (NHANES)  |       |                         |                   |
| No                      | 431   | 174508                  | 1 (ref)           |
| Yes                     | 170   | 33708                   | 1.31 (0.99, 1.74) |
| Edentulism              | 199   | 15097                   | 2.02 (1.49, 2.73) |
| Periodontitis (CDC/AAP) |       |                         |                   |
| No                      | 401   | 179167                  | 1 (ref)           |
| Mild                    | 21    | 5765                    | 1.43 (0.77, 2.64) |
| Moderate                | 140   | 19196                   | 1.42 (1.00, 2.02) |
| Severe                  | 39    | 4088                    | 2.17 (1.15, 4.11) |
| <i>P</i> -trend         |       |                         | <0.01             |
| Edentulism              | 199   | 15097                   | 2.13 (1.56, 2.91) |
| Model 2 <sup>c</sup>    |       |                         |                   |
| Periodontitis (NHANES)  |       |                         |                   |
| No                      | 431   | 174508                  | 1 (ref)           |
| Yes                     | 170   | 33708                   | 1.11 (0.85, 1.47) |
| Edentulism              | 199   | 15097                   | 1.62 (1.23, 2.15) |
| Periodontitis (CDC/AAP) |       |                         |                   |
| No                      | 401   | 179167                  | 1 (ref)           |
| Mild                    | 21    | 5765                    | 1.30 (0.72, 2.36) |
| Moderate                | 140   | 19196                   | 1.11 (0.79, 1.57) |
| Severe                  | 39    | 4088                    | 1.55 (0.80, 2.99) |
| <i>P</i> -trend         |       |                         | 0.17              |
| Edentulism              | 199   | 15097                   | 1.67 (1.25, 2.24) |

| Model 3 <sup>d</sup>    |     |        |                   |
|-------------------------|-----|--------|-------------------|
| Periodontitis (NHANES)  |     |        |                   |
| No                      | 431 | 174508 | 1 (ref)           |
| Yes                     | 170 | 33708  | 1.09 (0.83, 1.44) |
| Edentulism              | 199 | 15097  | 1.53 (1.15, 2.04) |
| Periodontitis (CDC/AAP) |     |        |                   |
| No                      | 401 | 179167 | 1 (ref)           |
| Mild                    | 21  | 5765   | 1.27 (0.69, 2.32) |
| Moderate                | 140 | 19196  | 1.09 (0.76, 1.55) |
| Severe                  | 39  | 4088   | 1.49 (0.77, 2.89) |
| <i>P</i> -trend         |     |        | 0.27              |
| Edentulism              | 199 | 15097  | 1.58 (1.17, 2.14) |

<sup>a</sup> HR = hazard ratio, CI = confidence interval, CDC/AAP = Centers for Disease Control/American Academy of Periodontology; Only 1 person with edentulism and 3 people with severe PD died of cancer among those who were aged 18-40 years

<sup>b</sup> Model 1 adjusted for age in years (continuous), sex (males and females), and race/ethnicity (non-Hispanic Black, and non-Hispanic White, Mexican-American, other race/ethnicity).

<sup>c</sup> Model 2 adjusted for age in years (continuous), sex (males and females), race/ethnicity (non-Hispanic Black, and non-Hispanic White, Mexican-American, other race/ethnicity), body mass index (continuous), pack years (continuous), smoking status (never, former, current), and diabetes (non-diabetic, pre-diabetic, diabetic).

<sup>d</sup> Model 3 adjusted for age in years (continuous), sex (males and females), race/ethnicity (non-Hispanic Black, and non-Hispanic White, Mexican-American, other race/ethnicity), body mass index (continuous), pack years (continuous), smoking status (never, former, current), diabetes (non-diabetic, pre-diabetic, diabetic), education (<high school, high school, >high school), annual family income (<\$25000, \$25000-\$74999, >\$74999), and health insurance (covered and not covered).
